# Supplementary material
Source: PubMed Central journal article supplement (PMC4499326)
Supplement: NIHMS699588-supplement-b.pdf [file NIHMS699588-supplement-b.pdf]

e-Table 2: Estimates of intervention effect size

| Category                                                                                      | % Relative risk reduction <sup>a</sup> |
|-----------------------------------------------------------------------------------------------|----------------------------------------|
| <i>Trials reporting on ICU admissions (n = 3)</i>                                             |                                        |
| mean (SD)                                                                                     | 37 (23)                                |
| median (IQR)                                                                                  | 50 (11, 51)                            |
| <i>Trials reporting on ICU LOS</i>                                                            |                                        |
| Intervention in acute care setting (n= 1)                                                     | 52%                                    |
| Intervention in outpatient setting (n= 1)                                                     | No change                              |
| <i>Intervention in ICU setting<sup>b</sup> (n= 14)</i>                                        |                                        |
| mean (SD)                                                                                     | 25 (22)                                |
| median (IQR)                                                                                  | 22 (45, 0)                             |
| <i>Intervention in ICU setting restricted to patient/provider targets<sup>b</sup> (n= 10)</i> |                                        |
| mean (SD)                                                                                     | 32 (22)                                |
| median (IQR)                                                                                  | 32 (48, 18)                            |

<sup>a</sup> Mean relative risk reduction value used from each trial except for Lilly trial (33) which only reported a median reduction in LOS.

<sup>b</sup> Estimates using relative risk reduction for survivors in the Dowdy study (21) and entire cohort in the Norton study (22).
