# Supplementary material
Source: PubMed Central journal article supplement (PMC4499326)
Supplement: NIHMS699588-supplement-c.pdf [file NIHMS699588-supplement-c.pdf]

e-Table 3: Eligibility criteria, intervention and outcomes for trials reporting on ICU length of stay included in estimates of effect, by intervention target

| Author (Reference)                                               | Year | Type of study                     | Patient Population                                                                                                                 | Intervention                                                                                                                                                                                                                                                                                                                                     | ICU LOS (days)                                                                                                                                                                                  | Difference in ICU LOS                      | Rel Risk Reduction                | Decedent analysis |
|------------------------------------------------------------------|------|-----------------------------------|------------------------------------------------------------------------------------------------------------------------------------|--------------------------------------------------------------------------------------------------------------------------------------------------------------------------------------------------------------------------------------------------------------------------------------------------------------------------------------------------|-------------------------------------------------------------------------------------------------------------------------------------------------------------------------------------------------|--------------------------------------------|-----------------------------------|-------------------|
| <i>Intervention Target: Patients in the acute care setting</i>   |      |                                   |                                                                                                                                    |                                                                                                                                                                                                                                                                                                                                                  |                                                                                                                                                                                                 |                                            |                                   |                   |
| Detering et al (24)                                              | 2010 | RCT                               | Medical inpatients ≥ 80 years old admitted to internal medicine, cardiology or respiratory medicine in a large university hospital | Formal advance care planning from trained facilitator                                                                                                                                                                                                                                                                                            | Mean 5.3 days in intervention vs. 11 days in control;; median 7 days for intervention vs. 15 days for control <sup>a</sup>                                                                      | Mean: -5.7 days<br>Median: -8 days         | 52%                               | No                |
| <i>Intervention Target: Patients in the outpatient setting</i>   |      |                                   |                                                                                                                                    |                                                                                                                                                                                                                                                                                                                                                  |                                                                                                                                                                                                 |                                            |                                   |                   |
| Bakitas, et al (25)                                              | 2009 | Multi-center RCT                  | Patients within 8-12 weeks of a new diagnosis of a life-limiting cancer and prognosis estimated at ~ 1 year                        | Multi-component, phone based palliative care intervention conducted by advanced practice nurses                                                                                                                                                                                                                                                  | No difference (0.06 vs. 0.06, p=1)                                                                                                                                                              | No change                                  | 0                                 | No                |
| <i>Intervention Target: Patients and/or Providers in the ICU</i> |      |                                   |                                                                                                                                    |                                                                                                                                                                                                                                                                                                                                                  |                                                                                                                                                                                                 |                                            |                                   |                   |
| Schneiderman, et al (7)                                          | 2000 | RCT                               | Adult and pediatric ICU patients in whom value-related treatment conflicts arose during the course of treatment                    | Ethics consultation                                                                                                                                                                                                                                                                                                                              | Decreased for decedents in intervention group, 4.2 vs. 13.2, p =0.03                                                                                                                            | -9 days                                    | 68%                               | Yes               |
| Schneiderman, et al (4)                                          | 2003 | Multi-center RCT                  | Adult ICU patients of 7 hospitals in whom value-related treatment conflicts arose during the course of treatment                   | Ethics consultation                                                                                                                                                                                                                                                                                                                              | Primary outcome with decedents: intervention 6.42 (SD 6.89) vs. 7.86 (SD 10.48), p=0.03; no difference for survivors                                                                            | -1.44 days                                 | 18%                               | Yes               |
| Ahrens, et al (28)                                               | 2003 | Non-RCT, unadjusted               | Medical ICU patients identified as having a high risk of dying                                                                     | Communication team consisting of physician and clinical nurse specialist<br>Proactive case finding facilitated by inpatient palliative care service/palliative care consultation; multifaceted palliative care program including family meetings<br>Proactive case-finding by inpatient palliative care service and palliative care consultation | Shorter LOS in intervention group, 6.1 (SD 5.41) vs. 9.5 (SD 10.16), p=0.009                                                                                                                    | -3.4 days                                  | 36%                               | No                |
| Campbell and Guzman, et al (29)                                  | 2003 | Historical controls, unadjusted   | Critically ill adults experiencing global cerebral ischemia (GCI) after CPR or multiple system organ failure (MOSF)                | Proactive ethics consultation                                                                                                                                                                                                                                                                                                                    | Decreased from mean 7.1 (SD 1.4) to 3.7 (SD 0.4) days for GCI after CPR, p<0.01; MOSF controls 10.7 (SD 2.2) versus 10.4 (SD 1.6) days, p=0.74                                                  | GCI: -3.4 days<br>MOSF: No change          | 48%                               | No                |
| Campbell and Guzman, et al (30)                                  | 2004 | Historical controls, unadjusted   | Patients with advanced-stage dementia                                                                                              | Proactive ethics consultation                                                                                                                                                                                                                                                                                                                    | Decreased from 6.8 (SD 0.98) to 3.5 (SD 0.5), p<0.004                                                                                                                                           | -3.3 days                                  | 49%                               | No                |
| Dowdy, et al (21)                                                | 1998 | Non-RCT, controlled by regression | ICU patients with >96 hours of mechanical ventilation                                                                              | Proactive ethics consultation                                                                                                                                                                                                                                                                                                                    | 7 days less for patients who died and 6 days less if in ethics proactive group (results are additive so average LOS for died and ethics consult was 13 days less than survivors in other group) | Survivors: -6 days;<br>Decedents: -13 days | Survivors: 28%;<br>Decedents: 30% | Yes               |
| Lilly, et al (33)                                                | 2003 | Pre-post, controlled by           | Adult patients admitted to a medical ICU                                                                                           | Intensive communication including a                                                                                                                                                                                                                                                                                                              | Decreased median LOS from 4 (IQR 2,11) to 3 (IQR 2,6) days                                                                                                                                      | -1 day                                     | 25% (median)                      | No                |

|                                                               |      |                                    |                                                                                                                                        |                                                                                                                     |                                                                                                                                                                                                                                                            |                                                  |                                       |     |  |
|---------------------------------------------------------------|------|------------------------------------|----------------------------------------------------------------------------------------------------------------------------------------|---------------------------------------------------------------------------------------------------------------------|------------------------------------------------------------------------------------------------------------------------------------------------------------------------------------------------------------------------------------------------------------|--------------------------------------------------|---------------------------------------|-----|--|
|                                                               |      | regression                         |                                                                                                                                        | multidisciplinary meeting held within 72 hours of ICU admission                                                     |                                                                                                                                                                                                                                                            |                                                  |                                       |     |  |
| Norton, et al (22)                                            | 2007 | Pre-post, unadjusted               | Medical ICU patients identified as having a high risk of dying                                                                         | Proactive palliative care consultation                                                                              | For overall cohort, decreased to 8.96 (SD 9.27) vs. usual care 16.28 (SD 16.54), p=0.001. For MICU decedents 5.72 days in intervention vs 14.12 in usual care, p=0.004. For hospital decedents, 9.17 days in intervention vs 16.09 in usual care, p=0.051. | Overall: -7.32 days<br>MICU decedents: -8.4 days | Entire cohort: 45%;<br>Decedents :60% | Yes |  |
| Andereck, et al (26)                                          | 2014 | RCT                                | English-speaking adult patients receiving treatment in the medical/surgical ICU for at least 5 continuous days                         | Proactive intervention of a series of encounters with a clinical ethicist                                           | Decedents only: 11 days in each arm (p=0.91)                                                                                                                                                                                                               | No change                                        | 0                                     | Yes |  |
| Daly, et al (35)                                              | 2010 | Pre-post, controlled by regression | Patients lacking decision-making capacity, with at least 72hr of mechanical ventilation and identified family surrogate decision maker | Intensive communication system, including a family meeting within 5 days of ICU admission and at least weekly after | Control group: mean 13.44 days (SD 9.18); Intervention group: 14.41 days (SD 9.85); p = 0.16                                                                                                                                                               | No change                                        | 0                                     | No  |  |
| <i>Intervention Target: System +/- Patient in ICU setting</i> |      |                                    |                                                                                                                                        |                                                                                                                     |                                                                                                                                                                                                                                                            |                                                  |                                       |     |  |
| Curtis, et al (31)                                            | 2008 | Pre-post, controlled by regression | Adult patients who died in the ICU                                                                                                     | Multifaceted quality improvement intervention targeting clinicians                                                  | Mean pre-intervention 7.19 (SD 8.81) versus post-intervention 5.83 (SD 7.76); Median pre-intervention 3.85 (IQR 1.57, 9.47) versus post-intervention 3.06 (IQR 1.02, 7.25), p=0.01;                                                                        | Mean: -1.36 days<br>Median: -0.79 days           | 19% mean; 21% median                  | Yes |  |
| Mosenthal, et al (32)                                         | 2008 | Pre-post, controlled by regression | Adult trauma patients admitted to the trauma ICU                                                                                       | Structured palliative care intervention integrated into standard ICU care in post period                            | For dying patients, mean decreased from 7.6 to 6.1 and median from 3 to 1, no p-value reported                                                                                                                                                             | Mean: -1.5 days<br>Median: -2 days               | 19% mean; 67% median                  | Yes |  |
| Curtis, et al (27)                                            | 2011 | Cluster RCT                        | Adults patients who died in the ICU                                                                                                    | Multifaceted quality improvement intervention targeting clinicians                                                  | Intervention group [baseline 4.5 (SD 6.0) versus post 5.0 (SD 6.3); Control group [baseline 6.8 (SD 11.1) versus 6.0 (SD 12.3), p =0.07                                                                                                                    | No change                                        | 0                                     | Yes |  |
| Shelton, et al (34)                                           | 2010 | Pre-post, controlled by regression | Patients admitted to the surgical ICU whose attending physician anticipated a prolonged length of stay or expected death soon          | Addition of a full-time family support coordinator to SICU team                                                     | Mean 11.80 in pre and 11.43 in post, p=0.89                                                                                                                                                                                                                | No change                                        | 0                                     | No  |  |

<sup>a</sup> Data provided by authors
